# Supplementary material
Source: PubMed Central journal article supplement (PMC6886126)
Supplement: NIHMS1060311-supplement-Supplemental.pdf [file NIHMS1060311-supplement-Supplemental.pdf]

## Supplemental Information

### Targeting PKC $\delta$ as a Therapeutic Strategy against Heterogeneous Mechanisms of EGFR

### Inhibitor Resistance in EGFR-Mutant Lung Cancer

Pei-Chih Lee, Yueh-Fu Fang, Hirohito Yamaguchi, Wei-Jan Wang, Tse-Ching Chen, Xuan Hong, Baozhen Ke, Weiya Xia, Yongkun Wei, Zhengyu Zha, Yan Wang, Han-Pin Kuo, Chih-Wei Wang, Chih-Yen Tu, Chia-Hung Chen, Wei-Chien Huang, Shu-Fen Chiang, Lei Nie, Junwei Hou, Chun-Te Chen, Longfei Huo, Wen-Hao Yang, Rong Deng, Katsuya Nakai, Yi-Hsin Hsu, Shih-Shin Chang, Tai-Jan Chiu, Jun Tang, Ran Zhang, Li Wang, Bingliang Fang, Ting Chen, Kwok-Kin Wong, Jennifer L. Hsu, and Mien-Chie Hung

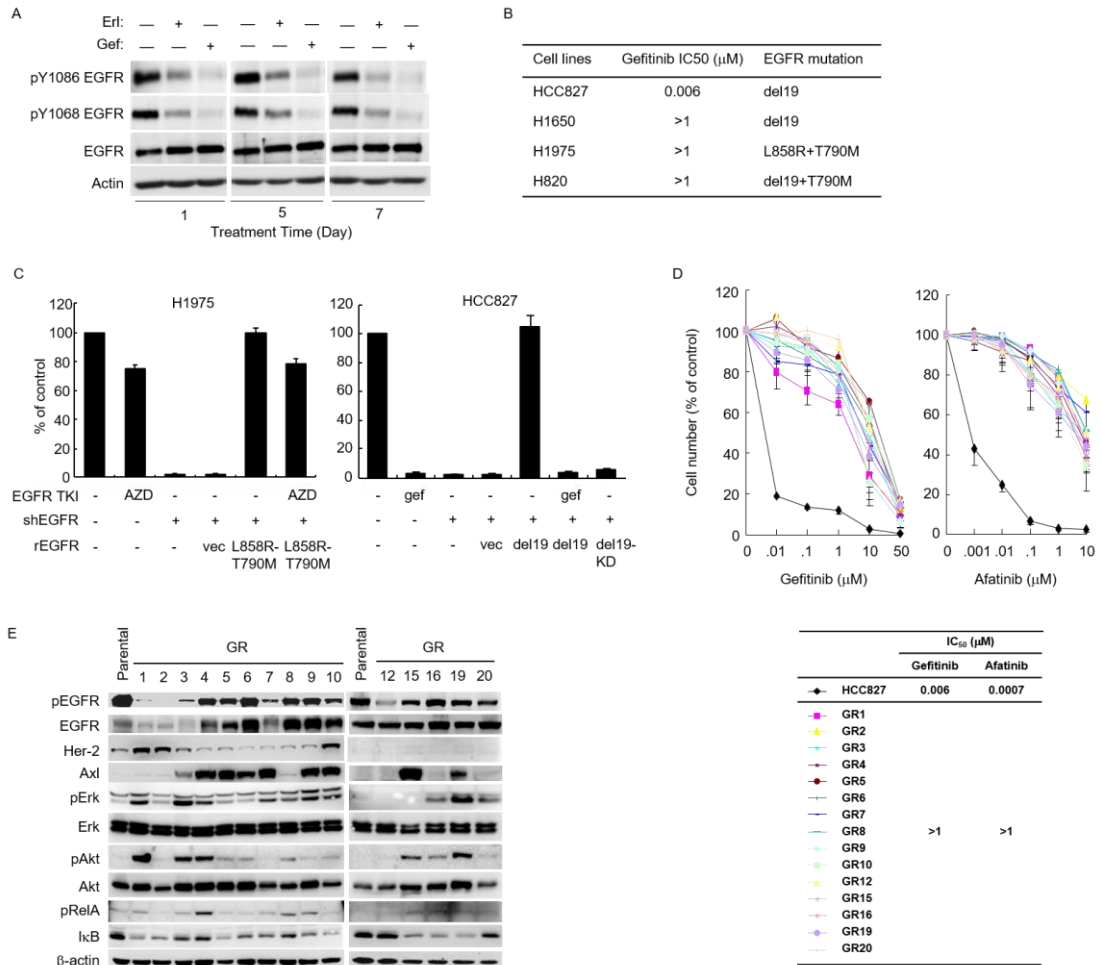

**Figure S1**, related to Figure 1. (A) Western blot showing Y1068 and Y1086 phosphorylation of EGFR in H1650 cells treated with gefitinib (gef, 1 μM) or erlotinib (erl, 0.1 μM) for 1, 5, and 7 days. (B) IC<sub>50</sub> of gefitinib in HCC827 sensitive and H1650, H1975, and H820 resistant cells. (C) Re-expression of endogenous EGFR reversed EGFR depletion–induced cell death. H1975 and HCC827 cells were infected with EGFR shRNA and re-expressed shRNA-resistant EGFR (rEGFR) variants, L858R+T790M (H1975) and del19 (HCC827), in presence or absence of 1 μM gef and 0.1 μM AZD9291 (AZD), respectively. The cells were counted after treatments for 7 days. (D) Cells were treated with gefitinib and afatinib for 3 days. Cells were counted and expressed as percent of control cells. IC<sub>50</sub> of gefitinib and afatinib in HCC827 parental and 15 GR cells were calculated and showed in bottom. (E) Parental and GR cell lysates were subjected to Western blots analysis with the indicated antibodies. Antibodies used correspond to previously reported features of known TKI resistance.

Data in (C) and (D) represent mean ± SD (n = 3).

**Table S1**, related to Figure 2. Twenty-seven potential mediators in the TKI-insensitive pathways identified by antibody array.

| <b>Modifier</b>                        | <b>shCtrl<br/>(A)</b> | <b>shCtrl+TKI<br/>(A+)</b> | <b>shEGFR<br/>(B)</b> | <b>EDR<br/>(C)</b> | <b>ratio of<br/>(C) / (B)</b> |
|----------------------------------------|-----------------------|----------------------------|-----------------------|--------------------|-------------------------------|
| B-RAF (Ab-446)*                        | 1.00                  | 0.97                       | 0.04                  | 1.20               | 30.51                         |
| CaMK2 (Phospho-Thr305)                 | 1.00                  | 0.86                       | 0.02                  | 1.03               | 49.32                         |
| CaMK4 (Phospho-Thr196/200)             | 1.00                  | 1.17                       | 0.06                  | 0.95               | 16.63                         |
| Catenin beta (CTNNB) (Phospho-Tyr489)* | 1.00                  | 0.91                       | 0.10                  | 1.15               | 11.58                         |
| Catenin delta-1 (Ab-228)               | 1.00                  | 1.14                       | 0.06                  | 1.13               | 18.41                         |
| CD5 (Ab-453)                           | 1.00                  | 1.15                       | 0.14                  | 1.11               | 8.10                          |
| c-Jun (Ab-73)                          | 1.00                  | 1.20                       | 0.05                  | 1.27               | 26.78                         |
| CK2-b (Phospho-Ser209)                 | 1.00                  | 0.85                       | 0.13                  | 0.63               | 4.93                          |
| c-met (Ab-1003)*                       | 1.00                  | 0.95                       | 0.08                  | 2.05               | 26.95                         |
| cofilin (Ab-3)                         | 1.00                  | 1.13                       | 0.12                  | 1.06               | 9.00                          |
| Cytokeratin 8 (Ab-431)                 | 1.00                  | 1.16                       | 0.08                  | 0.55               | 7.12                          |
| Ephrin B (Ab-330)                      | 1.00                  | 0.99                       | 0.07                  | 1.88               | 28.43                         |
| Estrogen Receptor-alpha (Ab-106)       | 1.00                  | 0.81                       | 0.03                  | 0.93               | 29.80                         |
| FAK (Ab-576)*                          | 1.00                  | 0.85                       | 0.11                  | 0.91               | 8.00                          |
| FKHR (Phospho-Ser319)*                 | 1.00                  | 0.96                       | 0.09                  | 1.79               | 19.37                         |
| HDAC5 (Ab-498)                         | 1.00                  | 1.04                       | 0.05                  | 0.98               | 21.25                         |
| LAT (Ab-191)                           | 1.00                  | 0.84                       | 0.09                  | 0.61               | 6.65                          |
| MAP3K7/TAK1 (Ab-439)                   | 1.00                  | 1.13                       | 0.05                  | 0.83               | 16.26                         |
| NFkB-p105/p50 (Ab-337)*                | 1.00                  | 0.92                       | 0.03                  | 0.72               | 24.17                         |
| PAK1 (Ab-212)                          | 1.00                  | 1.10                       | 0.08                  | 0.76               | 9.03                          |
| PKC beta/PKCB (Phospho-Ser661)         | 1.00                  | 0.90                       | 0.12                  | 0.96               | 8.32                          |
| PKC delta (Phospho-Thr505)             | 1.00                  | 0.99                       | 0.14                  | 0.68               | 4.74                          |
| PLCg2 (Ab-1217)                        | 1.00                  | 0.88                       | 0.12                  | 0.86               | 7.29                          |
| Raf1 (Ab-338)*                         | 1.00                  | 0.91                       | 0.14                  | 1.39               | 9.91                          |
| Rb (Ab-795)                            | 1.00                  | 1.08                       | 0.10                  | 1.07               | 10.53                         |
| SRF (Phospho-Ser77)                    | 1.00                  | 0.99                       | 0.11                  | 2.22               | 19.65                         |
| VASP (Ab-238)                          | 1.00                  | 1.13                       | 0.06                  | 0.64               | 11.51                         |

\*Candidates that have previously been implicated with resistance to EGFR inhibitors.

**Table S2**, related to Figure 2. Top 32 affected pathways by Ingenuity Pathway Analysis based on the 27 potential mediators identified.

| <b>Ingenuity Canonical Pathways</b>                                            | <b>-log (p-value)</b> | <b>Molecules</b>                                                                                            |
|--------------------------------------------------------------------------------|-----------------------|-------------------------------------------------------------------------------------------------------------|
| Molecular Mechanisms of Cancer                                                 | 1.69E01               | Raf1,NF-kB-p105/p50,B-Raf,FAK,RB,PAK1,c-Jun,FKHR,PKC delta,MAP3K7,Catenin beta,PKC beta,catenin delta,CaMK2 |
| B Cell Receptor Signaling                                                      | 1.55E01               | FAK,Raf1,CaMK4,c-Jun,FKHR,Cofilin,PLCg2,MAP3K7,NF-kB-p105/p50,CaMK2,PKC beta                                |
| HGF Signaling                                                                  | 1.38E01               | FAK,c-Met,Raf1,PAK1,c-Jun,PKC delta,PLCg2,MAP3K7,PKC beta                                                   |
| Chemokine Signaling                                                            | 1.34E01               | FAK,Raf1,CaMK4,c-Jun,Cofilin,PLCg2,CaMK2,PKC beta                                                           |
| LPS-stimulated MAPK Signaling                                                  | 1.31E01               | Raf1,PAK1,c-Jun,PKC delta,SRF,MAP3K7,NF-kB-p105/p50,PKC beta                                                |
| GNRH Signaling                                                                 | 1.3E01                | FAK,Raf1,PAK1,c-Jun,PKC delta,MAP3K7,NF-kB-p105/p50,CaMK2,PKC beta                                          |
| Protein Kinase A Signaling                                                     | 1.18E01               | FAK,B-Raf,Raf1,CaMK4,PKC delta,PLCg2,NF-kB-p105/p50,Catenin beta,VASP,CaMK2,PKC beta                        |
| Renin-Angiotensin Signaling                                                    | 1.17E01               | FAK,Raf1,PAK1,c-Jun,PKC delta,PLCg2,NF-kB-p105/p50,PKC beta                                                 |
| ERK/MAPK Signaling                                                             | 1.15E01               | FAK,B-Raf,Raf1,PAK1,PKC delta,PLCg2,SRF,ER alpha,PKC beta                                                   |
| Role of Macrophages, Fibroblasts and Endothelial Cells in Rheumatoid Arthritis | 1.14E01               | Raf1,CaMK4,c-Jun,PKC delta,PLCg2,MAP3K7,NF-kB-p105/p50,Catenin beta,CaMK2,PKC beta                          |
| Melatonin Signaling                                                            | 1.13E01               | B-Raf,Raf1,CaMK4,PKC delta,PLCg2,CaMK2,PKC beta                                                             |
| ErbB Signaling                                                                 | 1.06E01               | Raf1,PAK1,c-Jun,FKHR,PKC delta,PLCg2,PKC beta                                                               |
| Glioma Signaling                                                               | 1.03E01               | Raf1,RB,CaMK4,PKC delta,PLCg2,CaMK2,PKC beta                                                                |
| Role of NFAT in Cardiac Hypertrophy                                            | 9.98E00               | Raf1,CaMK4,PKC delta,PLCg2,MAP3K7,HDAC5,CaMK2,PKC beta                                                      |
| Corticotropin Releasing Hormone Signaling                                      | 9.86E00               | B-Raf,Raf1,CaMK4,c-Jun,PKC delta,PLCg2,PKC beta                                                             |
| IL-8 Signaling                                                                 | 9.84E00               | FAK,B-Raf,Raf1,c-Jun,PKC delta,NF-kB-p105/p50,VASP,PKC beta                                                 |
| Thrombin Signaling                                                             | 9.77E00               | FAK,Raf1,CaMK4,PKC delta,PLCg2,NF-kB-p105/p50,CaMK2,PKC beta                                                |
| Axonal Guidance Signaling                                                      | 9.67E00               | FAK,c-Met,Raf1,Ephrin B,PAK1,Cofilin,PKC delta,PLCg2,VASP,PKC beta                                          |
| PI3K Signaling in B Lymphocytes                                                | 9.43E00               | Raf1,CaMK4,c-Jun,PLCg2,NF-kB-p105/p50,CaMK2,PKC beta                                                        |
| Erythropoietin Signaling                                                       | 9.31E00               | Raf1,c-Jun,PKC delta,PLCg2,NF-kB-p105/p50,PKC beta                                                          |
| IL-3 Signaling                                                                 | 9.16E00               | Raf1,PAK1,c-Jun,FKHR,PKC delta,PKC beta                                                                     |
| Phospholipase C Signaling                                                      | 9.04E00               | Raf1,CaMK4,PKC delta,PLCg2,LAT,NF-kB-p105/p50,HDAC5,PKC beta                                                |
| PDGF Signaling                                                                 | 8.94E00               | Raf1,c-Jun,PLCg2,SRF,CK2-b,PKC beta                                                                         |
| Regulation of IL-2 Expression in Activated and Anergic T Lymphocytes           | 8.91E00               | Raf1,CaMK4,c-Jun,PLCg2,LAT,NF-kB-p105/p50                                                                   |
| Xenobiotic Metabolism Signaling                                                | 8.69E00               | Raf1,CaMK4,PKC delta,MAP3K7,NF-kB-p105/p50,HDAC5,CaMK2,PKC beta                                             |
| NF-κB Signaling                                                                | 8.46E00               | B-Raf,Raf1,PLCg2,MAP3K7,CK2-b,NF-kB-p105/p50,PKC beta                                                       |
| UV-Induced MAPK Signaling                                                      | 8.45E00               | B-Raf,Raf1,c-Jun,PKC delta,PKC beta                                                                         |
| IGF-1 Signaling                                                                | 8.33E00               | FAK,Raf1,c-Jun,FKHR,SRF,CK2-b                                                                               |
| Cholecystokinin/Gastrin-mediated Signaling                                     | 8.22E00               | FAK,Raf1,c-Jun,PKC delta,SRF,PKC beta                                                                       |
| Rac Signaling                                                                  | 8.17E00               | FAK,Raf1,PAK1,c-Jun,Cofilin,NF-kB-p105/p50                                                                  |
| Leukocyte Extravasation Signaling                                              | 8.06E00               | FAK,PKC delta,PLCg2,Catenin beta,VASP,catenin delta,PKC beta                                                |
| Natural Killer Cell Signaling                                                  | 8.05E00               | Raf1,PAK1,PKC delta,PLCg2,LAT,PKC beta                                                                      |

**Table S3**, related to Figure 2. Synthetic lethal screen of gefitinib with inhibitors targeting potential mediators or their affected pathways in H1650 cells.

| Target                    | Inhibitor name                  | Clinical status | Dose range | Synergy with gefitinib (CI) |
|---------------------------|---------------------------------|-----------------|------------|-----------------------------|
| β-catenin nuclear complex | ICG-001                         |                 | 1-15 μM    | >1.1                        |
|                           | PNU-74654                       |                 | 1-15 μM    | >1.1                        |
|                           | Resveratrol (non-selective)     |                 | 1-50 μM    | >1.1                        |
| β-catenin                 | Aspirin (non-selective, NSAID)  | FDA approved    | 0.5-8 μM   | 0.5-0.9                     |
|                           | Sulindac (non-selective, NSAID) | FDA approved    | 1-20 μM    | 0.5-0.9                     |
| CaMKII                    | KN-62                           |                 | 0.1-10 μM  | 0.5-0.9                     |
| FZD-Dvl                   | Dvl-PDZ (3289-8625)             |                 | 0.5-25 μM  | 0.9-1.1                     |
|                           | NSC668036                       |                 | 0.5-50 μM  | >1.1                        |
| IκB kinase                | BMS-345541                      |                 | 1-30 μM    | 0.4-1.1                     |
| JNK                       | SP600125                        |                 | 1-20 μM    | 0.9-1.1                     |
| MEK                       | Trametinib                      | FDA approved    | 2.5-20 nM  | 0.4-0.5                     |
| NFAT                      | NFAT inhibitor                  |                 | 1-20 μM    | >1.1                        |
| PKCβ                      | Enzastaurin**                   | Phase 3         | 0.5-20 μM  | 1.0-1.4                     |
| PKC-pan                   | Go6983**                        |                 | 1-40 μM    | *0.2-0.8                    |
|                           | Sotrastaurin (AEB071) **        | Phase 2         | 0.5-20 μM  | *0.1-0.8                    |
| PLC                       | U-73122 (Stroidamine)           |                 | 1-5 μM     | *0.3-0.7                    |
| PI-PLC                    | Edelfosine                      |                 | 1.5-30 μM  | >1.1                        |
| PLD1, PLD2                | FIPI                            |                 | 0.1-10 μM  | 0.5-0.9                     |
| PLD                       | VU0359595                       |                 | 0.1-10 μM  | 0.5-0.9                     |
| Wnt <sup>#</sup>          | IWP2 (Porcupine inactivator)    |                 | 0.05-10 μM | 0.5-0.9                     |
|                           | IWP4 (Porcupine inactivator)    |                 | 0.5-50 μM  | 0.5-0.9                     |
|                           | LGK-974 (Porcupine inhibitor)   |                 | 0.01-1 μM  | >1.1                        |

Non-steroidal anti-inflammatory drug (NSAID); combination index (CI).

\*Strong synergy (CI value  $\leq 0.3$ ); shown in red.

\*\*Go6983 inhibited PKC $\alpha$ ,  $\beta$ ,  $\gamma$ ,  $\delta$ ,  $\zeta$ , and  $\mu$  isoforms, and sotrastaurin inhibited  $\alpha$ ,  $\beta$ ,  $\delta$ ,  $\epsilon$ ,  $\eta$ , and  $\theta$ . Enzastaurin (so-call PKC $\beta$  inhibitor) inhibited PKC $\alpha$  and  $\beta$ .

<sup>#</sup>Mediators involved in canonical and non-canonical Wnt signaling although the Wnt receptor was not identified (Table S2). PKC inhibitors are shown in green and blue.

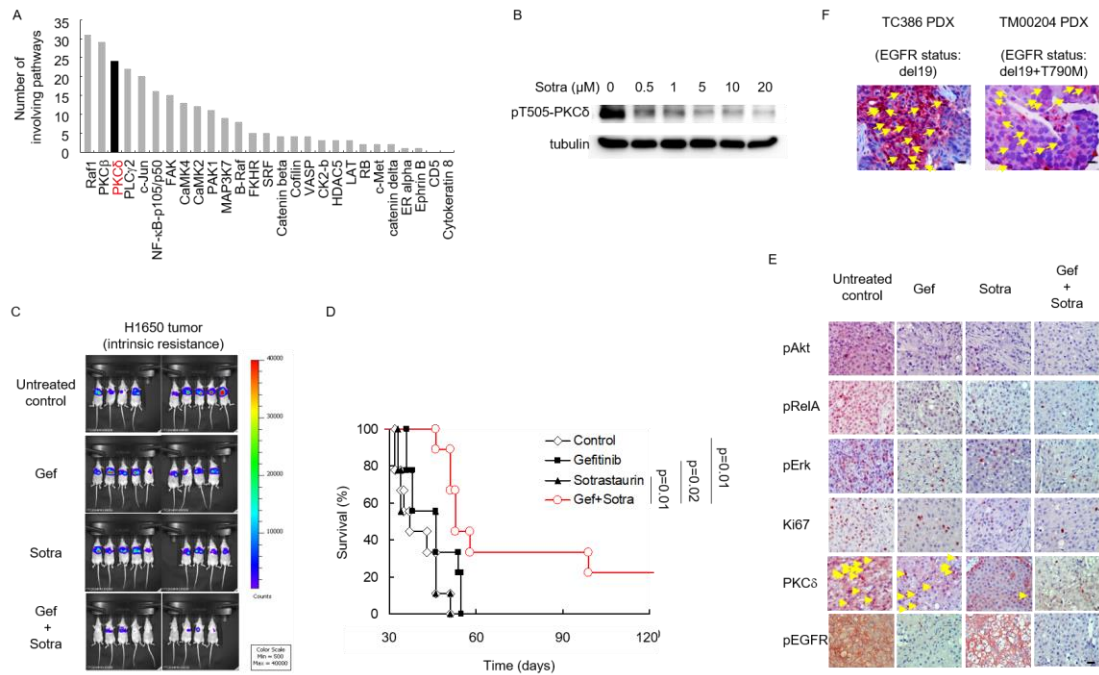

**Figure S2**, related to Figure 2. (A) The numbers of canonical pathways involving the 27 candidates identified in Figure 2B. Ingenuity pathway analysis identified a total 32 canonical pathways involving the 27 candidates (Table S2). The canonical pathways involving each individual candidate were counted. (B) The effects of sotrastaurin (sotra) treatment on T505 phosphorylation of PKC $\delta$  in H1650 cells. Western blot showing T505 phosphorylation of PKC $\delta$  in H1650 cells treated with sotra for 24 hr. (C) Images of mice with H1650 tumors at day 14. (D) Mice survival in combination group compared to control, gef, and sotra alone groups. Data represent mean  $\pm$  SEM (n = 9).  $p < 0.05$  statistically significant by Student's t test. (E) Related to Figure 2G. Representative IHC images of pAkt, pRelA, pErk, Ki67, PKC $\delta$ , and pEGFR in H1650 xenografts from mice treated as indicated. Yellow arrows denote representative nuclear PKC $\delta$ -positive cells. Bar, 50  $\mu$ m. (F) Representative IHC images of nPKC $\delta$  positive PDX tumors. Yellow arrow denotes representative nuclear PKC $\delta$ -positive cells. Bar, 10  $\mu$ m.

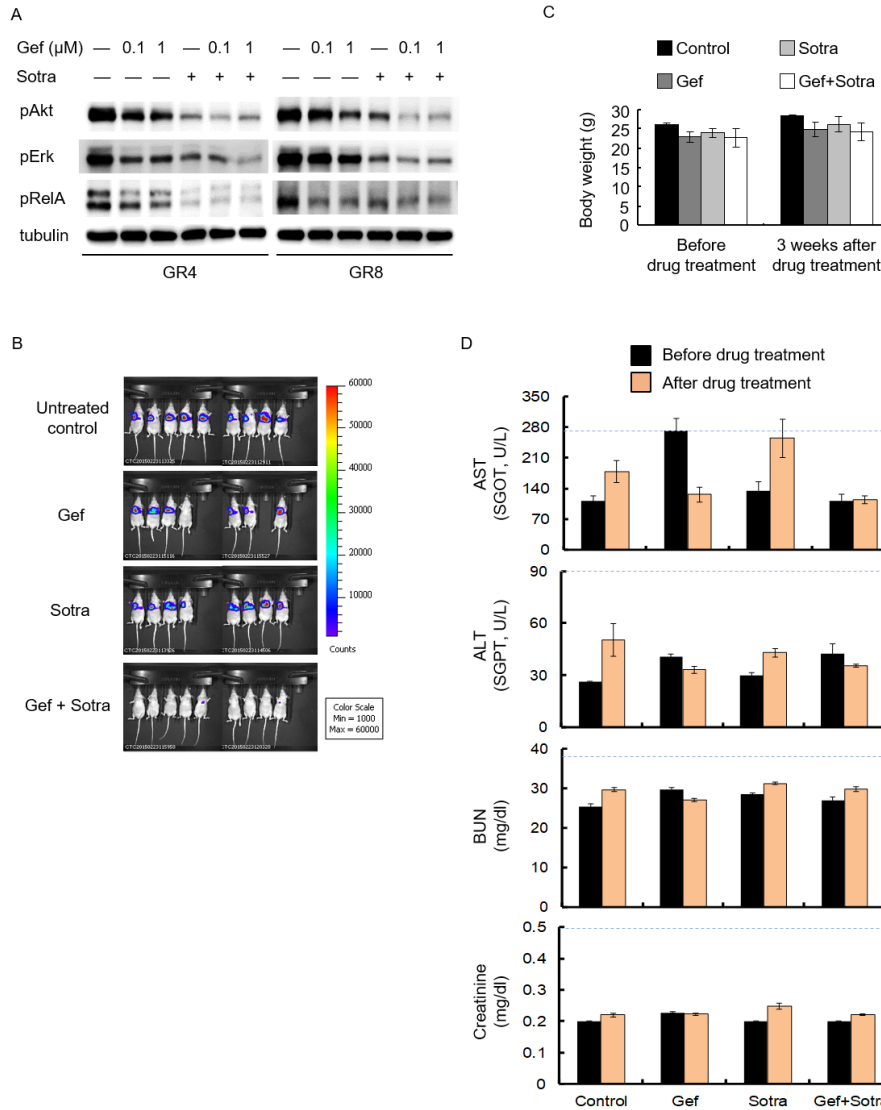

**Figure S3**, related to Figure 3. (A) Western blot showing pAkt, pErk, pRelA in GR cells treated with gef, 10  $\mu$ M sotra, and the combination for 24 hr. (B) Images of mice with GR6 tumors at day 28. (C, D) Body weight changes (C) as well as indicators for liver and kidney functions (D) in each treatment group before and after drug treatment for 3 weeks. The normal range of aspartate aminotransaminase (AST), alanine aminotransaminase (ALT), blood urea nitrogen (BUN), and creatinine are 63–253 U/L, 35–90 U/L, 17–38 mg/dl, and 0.3–0.5 mg/dl, respectively.

Data in (C) and (D) represent mean  $\pm$  SD (n = 3).

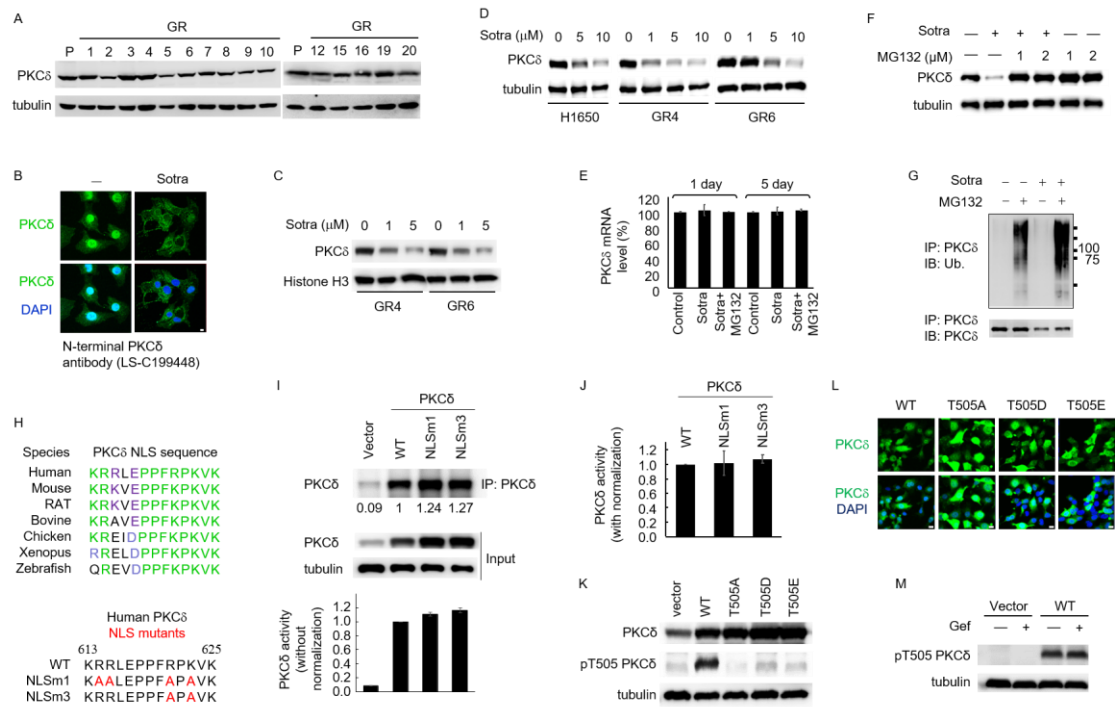

**Figure S4**, related to Figure 4. (A) Western blots showing total PKC $\delta$  expression in HCC827 parental (P) and GR cells. (B) Confocal microscopy analysis of PKC $\delta$  localization in H1650 cells treated with 10  $\mu$ M sotra for 24 hr using the LS-C199448 antibody that recognizes the N-terminal region of PKC $\delta$ . Bar, 10  $\mu$ m. (C) Western blots showing PKC $\delta$  expression in nuclear extracts of GR4 and GR6 cells treated with sotra for 24 hr. (D) Western blots showing total PKC $\delta$  expression in whole cell extracts of H1650, GR4, and GR6 cells treated with sotra for 24 hr. (E) Real-time PCR analysis of PKC $\delta$  messenger RNA levels in H1650 cells treated with 10  $\mu$ M sotra followed by the treatment with or without proteasome inhibitor MG132 (2  $\mu$ M) for 24 hr. (F, G) Western blots showing PKC $\delta$  protein (F) and ubiquitination (G) levels in H1650 cells treated with 10  $\mu$ M sotra followed by the treatment with or without MG132 for 24 hr. (H) Top, sequence alignment of PKC $\delta$  nuclear localization signal (NLS) domain across species. Bottom, NLS of human wide-type (WT) PKC $\delta$  and NLS mutants. Red letters indicate the mutated amino acid residues within the NLS. (I, J) Analysis of PKC $\delta$  kinase activity in HCC827 cells expressing endogenous PKC $\delta$  (Vector), exogenous WT PKC $\delta$ , PKC $\delta$  mutant NLSm1, or PKC $\delta$  mutant NLSm3. (I) PKC $\delta$  protein expression levels (top) and the raw PKC $\delta$  activities (bottom) normalized to PKC $\delta$  activity by protein expression level (J). (K) Western blot analysis of total PKC $\delta$  and pT505 PKC $\delta$  expression in HCC827 cells expressing vector, WT, T505A, T505D, or T505E mutant PKC $\delta$ . (L) Confocal microscopy analysis of PKC $\delta$  localization in HCC827 expressing WT, T505A, T505D, or T505E mutant PKC $\delta$ . Bar, 20  $\mu$ m. (M) Western blot analysis of pT505 PKC $\delta$  expression in ectopic WT PKC $\delta$  expressing HCC827 cells treated with 0.1  $\mu$ M gefitinib for 24 hr. Data in (E), (I), and (J) represent mean  $\pm$  SD (n = 3).



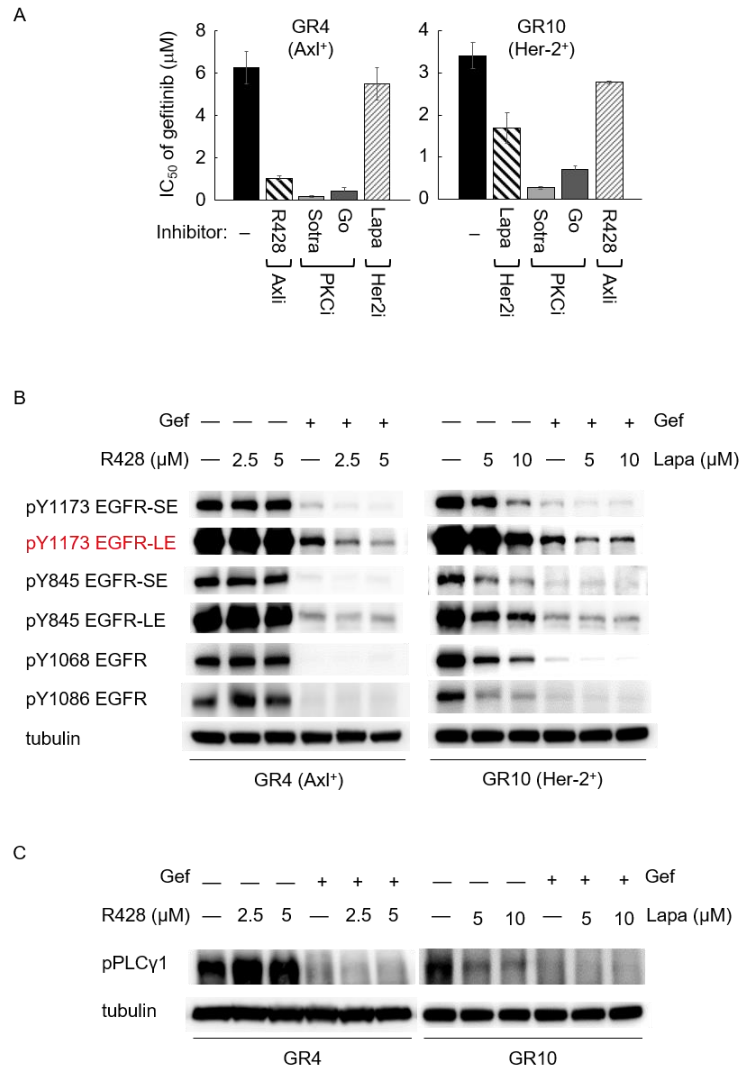

**Figure S5**, related to Figure 5. (A) The median inhibitory concentrations (IC<sub>50</sub>) of gefitinib in Axl-positive GR4 and Her-2-positive GR10 cells measured after 10 days of treatment of R428 (Axli, 2.5 µM) and Lapatinib (Lapa, Her2i, 5 µM) as well as sotra and Go6983 (Go), (PKCi, 10 µM) in GR4 and GR10 cells with gefitinib. Data represent mean ± SD (n = 3). (B) Western blot showing phosphorylation of EGFR Y1173, Y845, Y1068, and Y1086 in GR4 and GR10 cells after 24 hr treatment of 0.1 µM gefitinib with R428 and Lapa, respectively. SE, short exposure; LE, long exposure. (C) Western blot showing phosphorylation of PLCγ1 in cells treated as in (B).

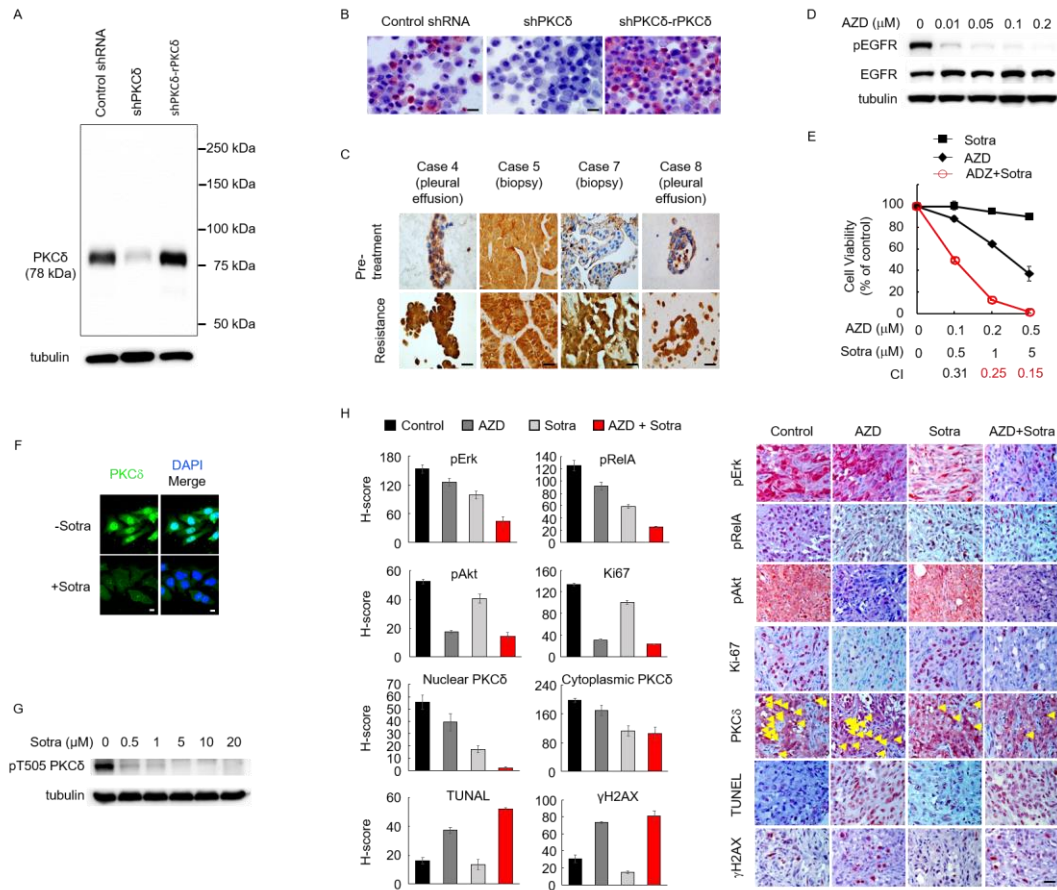

**Figure S6**, related to Figure 6. (A and B) Western blot (A) and IHC staining (B) in H1650 cells showing the specificity of PKC $\delta$  antibody (abcam ab182126) used for human IHC staining. The samples were H1650 control shRNA, PKC $\delta$ -depleted (shPKC $\delta$ ), and re-expressing shRNA-resistant PKC $\delta$  (rPKC $\delta$ ) cells from left to right in that order. PKC $\delta$ -depleted samples were used as negative control. Bar, 30  $\mu$ m. (C) Representative images of PKC $\delta$  by IHC staining in paired pretreatment and resistance specimens of cases 4, 5, 7, and 8 in Table 1. Bar, 50  $\mu$ m. (D) H1975 cells were treated with AZD9291 for 24 h. The cell extracts were subjected to Western blotting. (E) Synergistic effects of sotra with AZD9291 (AZD) in H1975 cells. Cells were treated with AZD and/or sotra for 15 days. Cell viability was assayed by crystal violet staining and the value of combination index (CI) calculated as in Figure 2E. (F) Confocal microscopy analysis showing PKC $\delta$  localization in H1975 cells treated with 10  $\mu$ M sotra for 24 hr. Bar, 10  $\mu$ m. (G) H1975 cells were treated with sotra for 24 h. The cell extracts were subjected to Western blotting. (H) Left, the H-score of Erk, RelA, and Akt phosphorylation, proliferation marker Ki67, nuclear and cytoplasmic PKC $\delta$ , apoptosis (TUNEL), and  $\gamma$ H2AX in H1975-derived xenograft tumors from mice treated as indicated. Right, representative IHC images of pErk, pRelA, pAkt, Ki67, PKC $\delta$ , TUNEL, and  $\gamma$ H2AX in H1975 xenografts from mice treated as indicated for 5 days. Yellow arrows denote representative nuclear PKC $\delta$ -positive cells. Bar, 50  $\mu$ m. Data in (E) and (H) represent mean  $\pm$  SD (n = 3).

**Table S4. related to Figure 6.** Objective response and progression-free survival of 19 patients with high nPKC $\delta$  tumors.

| ID | smoking | EGFR alteration | TKI     | Objective response | PFS (m) |
|----|---------|-----------------|---------|--------------------|---------|
| 1  | no      | 19DEL           | Gef     | SD                 | 9.2     |
| 2  | no      | 19DEL           | Erl     | PR                 | 4.9     |
| 3  | no      | L858R           | Gef     | PD                 | 1.6     |
| 4  | no      | L858R           | Gef     | PD                 | 2.7     |
| 5  | no      | 19DEL           | Gef     | SD                 | 6.1     |
| 6  | no      | 19DEL           | Gef     | SD                 | 13.0    |
| 7  | no      | 19DEL           | Gef     | SD                 | 8.4     |
| 8  | no      | G719A           | Gef     | SD                 | 7.9     |
| 9  | no      | V769_D770inASV  | Erl/Gef | PD                 | 1.9     |
| 10 | no      | 19DEL           | Gef     | PR                 | 15.9    |
| 11 | no      | L858R           | Gef     | PR                 | 3.2     |
| 12 | no      | 19DEL           | Gef     | NA                 | 2.1     |
| 13 | no      | 19DEL           | Erl     | PD                 | 1.5     |
| 14 | no      | T790M, L858R    | Gef     | PD                 | 0.7     |
| 15 | no      | S768I, G719A    | Erl     | SD                 | 6.8     |
| 16 | no      | 19DEL           | Gef     | SD                 | 6       |
| 17 | yes     | 19DEL           | Gef     | PD                 | 0.5     |
| 18 | no      | L858R           | Gef     | PR                 | 3.9     |
| 19 | no      | 19DEL           | Gef/Erl | PD                 | 3       |

Gef, gefitinib; Erl, erlotinib; SD, stable disease; PR, partial response; PD, progression disease; NA, data not available.
